# Supplementary material for: Comparison of Cost Analysis in Patients with Tetrahydrobiopterin-Responsive and Non-Responsive Phenylketonuria in Turkey
Source: MDPI journal article supplement (doi:10.3390/nu16101444), 2024-05-10
Supplement: s1 [file s1]

Supplement Table S1. Comparison of the state's economic damage by age groups

| Age groups | N   | Mean±SD     | (Median) | (Min-Max) (€/year) | p value |
|------------|-----|-------------|----------|--------------------|---------|
| 1-3        | 37  | 20177±8578  | (10660)  | (487-29942)        | 0.006   |
| 3-12       | 67  | 22558±16025 | (20663)  | (352-75953)        |         |
| 12<        | 15  | 17829±20190 | (10187)  | (3410-67664)       |         |
| Overall    | 119 | 18801±15345 | (15834)  | (352-75953)        |         |

Mean ± SD, median and min-max values are given as €/year

**Supplement Table S2. Analysis of the state's economic damage in subgroups**

| Treatment        | Values     | BH4         | Phe-free<br>formula and<br>milk | Test     | Examination | Special<br>Education and<br>Rehabilitation | Hospitalization | Other medications | Diaper  | Overall damage | p<br>value* |
|------------------|------------|-------------|---------------------------------|----------|-------------|--------------------------------------------|-----------------|-------------------|---------|----------------|-------------|
| Diet             | Mean±SD    |             | 6859±3895                       | 62±38    | 260±114     | 793±392                                    | 38±38           | 1558±3697         | 316±264 | 7914±4930      | <0.001*     |
|                  | Median (n) |             | 6674 (47)                       | 52 (50)  | 55 (50)     | 974 (6)                                    | 25 (5)          | 189 (7)           | 317 (2) | 7860 (50)      |             |
|                  | Min-Max    |             | 872-20800                       | 24-172   | 55-500      | 255-1229                                   | 4-100           | 31-9941           | 130-504 | 352-23528      |             |
| BH4              | Mean±SD    | 20177±12505 |                                 | 75±43    | 294±106     |                                            | 38±32           |                   |         | 20566±12465    |             |
|                  | Median (n) | 16163 (44)  |                                 | 62 (44)  | 300 (44)    |                                            | 24 (6)          |                   |         | 16757 (44)     |             |
|                  | Min-Max    | 3776-64652  |                                 | 24-170   | 111-412     |                                            | 12-116          |                   |         | 4352-64896     |             |
| BH4<br>+<br>Diet | Mean±SD    | 31208±13537 | 5515±2516                       | 73±43    | 379±334     | 777±277                                    | 44±35           |                   |         | 37470±14628    |             |
|                  | Median (n) | 32326 (25)  | 4720 (25)                       | 64 (25)  | 396 (25)    | 778 (2)                                    | 44 (2)          |                   |         | 36254 (25)     |             |
|                  | Min-Max    | 11330-64652 | 2325-10893                      | 24-213   | 103-1907    | 581-974                                    | 19-69           |                   |         | 16704-75953    |             |
| Overall          | Mean±SD    | 24174±13859 | 6392±3519                       | 69±41    | 297±185     | 789±348                                    | 39±36           | 1558±3697         | 316±264 | 18801±15345    |             |
|                  | Median (n) | 24244 (69)  | 5697 (72)                       | 59 (119) | 300 (119)   | 974 (8)                                    | 25 (13)         | 189 (7)           | 317 (2) | 15834 (119)    |             |
|                  | Min-Max    | 3776-64652  | 873-20800                       | 24-213   | 55-1907     | 255-1229                                   | 4-116           | 31-9941           | 130-504 | 352-75953      |             |

Mean ± SD, median and min-max values are given as €/year.

**Supplement Table S3. Non-medical economic damage to the families (exluding food fee)**

| Treatment                 |                  | Transportation | Out-of-pocket<br>in hospital | Parking    | Shipping      | Day care for<br>patient with PKU | Day care for<br>siblings |
|---------------------------|------------------|----------------|------------------------------|------------|---------------|----------------------------------|--------------------------|
| <b>Diet</b>               | Mean±SD (n)      | 227±362 (50)   | 82±91 (46)                   | 44±30 (27) | 88±91 (7)     |                                  | 2158                     |
|                           | Median (min-max) | 103 (5-2275)   | 53 (5-470)                   | 45 (5-88)  | 58 (29-288)   |                                  | 2158                     |
| <b>BH4</b>                | Mean±SD (n)      | 273±305 (42)   | 63±77(42)                    | 46±36 (19) | 108±7 (3)     | 1439±1017(2)                     |                          |
|                           | Median (min-max) | 43 (10-1487)   | 35 (1-326)                   | 43 (2-88)  | 108 (100-115) | 1439 (719-1439)                  |                          |
| <b>BH4<br/>+<br/>Diet</b> | Mean±SD (n)      | 334±455 (25)   | 83±141 (21)                  | 44±35 (11) | 161 (1)       | 2662±3561 (2)                    |                          |
|                           | Median (min-max) | 146 (24-1833)  | 882 (2-624)                  | 32 (3-86)  | 161           | 2662 (144-5180)                  |                          |
| <b>Overall</b>            | Mean±SD (n)      | 266±364 (117)  | 75±98 (109)                  | 45±32(57)  | 100±74 (11)   | 2050±2251 (4)                    | 2158                     |
|                           | Median (min-max) | 114 (5-2275)   | 41 (1-624)                   | 45 (2-88)  | 86 (29-288)   | 1439 (144-5180)                  | 2158                     |

Mean ± SD, median and min-max values are given as €/year.

**Supplement Table S4. Fees of low-protein foods**

| Low-protein<br>food   | Diet |         |        |            | BH4 + Diet |           |        |           |
|-----------------------|------|---------|--------|------------|------------|-----------|--------|-----------|
|                       | n    | Mean±SD | Median | Min-max    | n          | Mean±SD   | Median | Min-max   |
| <b>Bread</b>          | 31   | 2±2.8   | (1)    | (0.1-12)   | 13         | 0.8±0.7   | (0.6)  | (0.2-2.6) |
| <b>Flour</b>          | 35   | 1.3±1   | (1.2)  | (0.1-4.3)  | 20         | 2.6±2.6   | (1.5)  | (0.4-9.6) |
| <b>Rice</b>           | 27   | 3±3     | (2)    | (0.2-11.5) | 14         | 3.2±2.5   | (2.9)  | (0.7-11)  |
| <b>Pasta</b>          | 35   | 4±3.5   | (3)    | (0.5-13)   | 19         | 3.4±3     | (2)    | (0.3-10)  |
| <b>Egg</b>            | 17   | 1.2±1   | (1)    | (0.5-4)    | 13         | 1.3±1.5   | (0.6)  | (0.2-5)   |
| <b>Meat</b>           | 26   | 3.1±3   | (2)    | (0.5-11.5) | 13         | 4±3.7     | (3)    | (0.5-15)  |
| <b>Other products</b> | 44   | 10±8.7  | (8)    | (0.3-36)   | 23         | 11.7±10.7 | (10)   | (0.5-44)  |

Mean ± SD, median and min-max values are given as €/week.

**Supplement Table S5. Fees of normal foods**

| Normal foods        | Diet |         |        |            | BH4 |         |        |            | BH4 + Diet |         |        |           |
|---------------------|------|---------|--------|------------|-----|---------|--------|------------|------------|---------|--------|-----------|
|                     | n    | Mean±SD | Median | Min-max    | n   | Mean±SD | Median | Min-max    | n          | Mean±SD | Median | Min-max   |
| <b>Vegetable</b>    | 46   | 2.2±1.4 | (2)    | (0.5-6.6)  | 42  | 1±0.6   | (0.9)  | (0.1-2.6)  | 25         | 1.8±0.9 | (1.8)  | (0.3-3.7) |
| <b>Fruit</b>        | 46   | 1.4±0.7 | (1.2)  | (0.5-3.4)  | 42  | 1±0.7   | (0.9)  | (0.1-3)    | 25         | 1.4±0.7 | (1.3)  | (0.2-3.4) |
| <b>Meat</b>         | 2    | 3.6±0   | (3.6)  | (3.6)      | 38  | 3±2.2   | (2.4)  | (0.6-11.7) | 1          | 4±0     | (4)    | (4.2)     |
| <b>Milk</b>         | 14   | 0.6±0.5 | (0.5)  | (0.06-1.7) | 41  | 1.7±0.8 | (1.6)  | (0.1-4.6)  | 12         | 1.2±1.2 | (0.8)  | (0.1-4.3) |
| <b>Flour</b>        | 9    | 0.5±0.5 | (0.4)  | (3±1.6)    | 40  | 0.5±0.5 | (0.3)  | (0.1-2)    | 8          | 0.6±0.6 | (0.3)  | (0.1-2)   |
| <b>Formula</b>      | 2    | 3.7±3.9 | (3.7)  | (1-6.5)    | 8   | 4.8±8.3 | (2.5)  | (0.4-25)   | 1          | 0.9±0   | (0.8)  | (0.9)     |
| <b>Ready-to-eat</b> | 28   | 0.8±0.6 | (0.5)  | (0.2-2.4)  | 40  | 2±1.8   | (1.4)  | (0.1-6)    | 16         | 1±0.9   | (1.2)  | (0.3-3.6) |
| <b>Other foods</b>  | 39   | 2±1.4   | (1.4)  | (0.2-5.5)  | 41  | 2±1     | (1.9)  | (0.3-5)    | 20         | 1.5±1.5 | (1)    | (0.2-5.9) |

Mean ± SD, median and min-max values are given as €/week.
